# Supplementary material
Source: PubMed Central journal article supplement (PMC2217637)
Supplement: plntcell_tpc.107.055905_1.pdf [file plntcell_tpc.107.055905_1.pdf]

Supplemental Data. Han et al. (2007). Minichromosome analysis of chromosome pairing, disjunction and sister chromatid cohesion in maize.

**Supplemental Figure 1.** Different sizes of minichromosomes derived from TB-9Sb-Dp9. Green is the 180-bp knob; magenta is the ZmBs signals and blue is DAPI (counterstain).

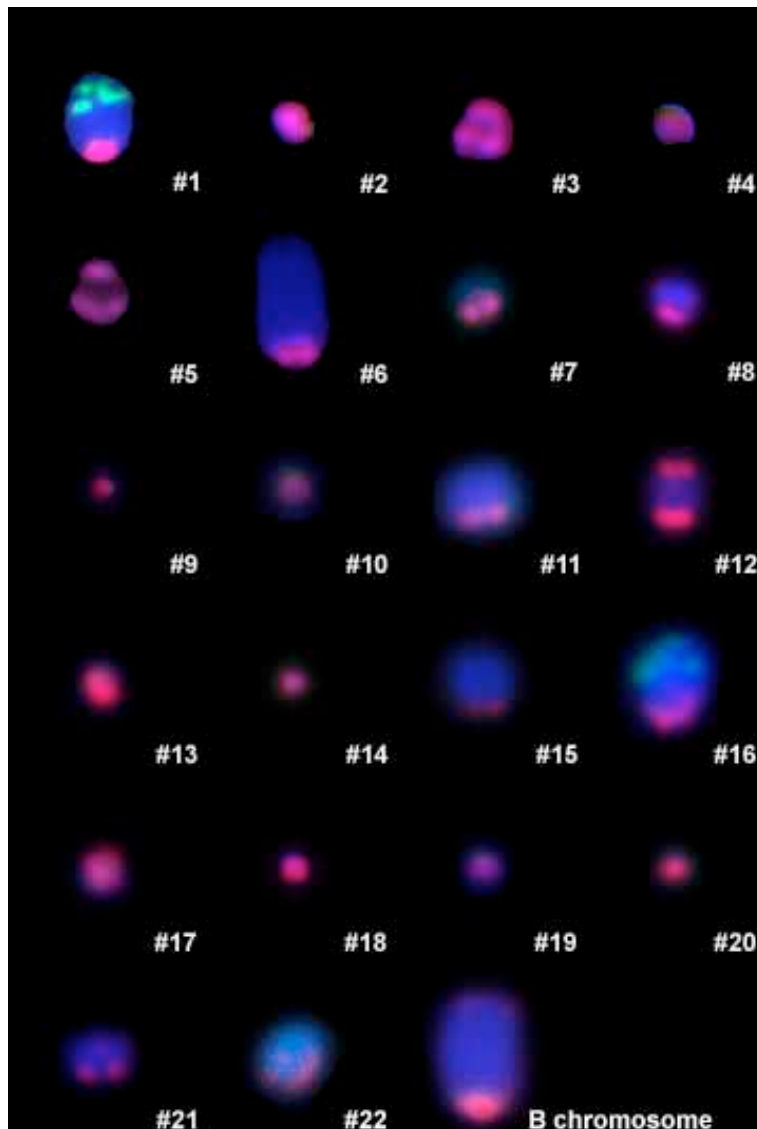

**Supplemental Figure 2.** Cytological analysis of two copies of minichromosome #18. ZmBs is labeled in magenta; knob is green. (A) Pachynema. (B) Anaphase I. No pairing occurs in pachynema and sister chromatids separate in Anaphase I. Arrows indicate the minichromosomes.

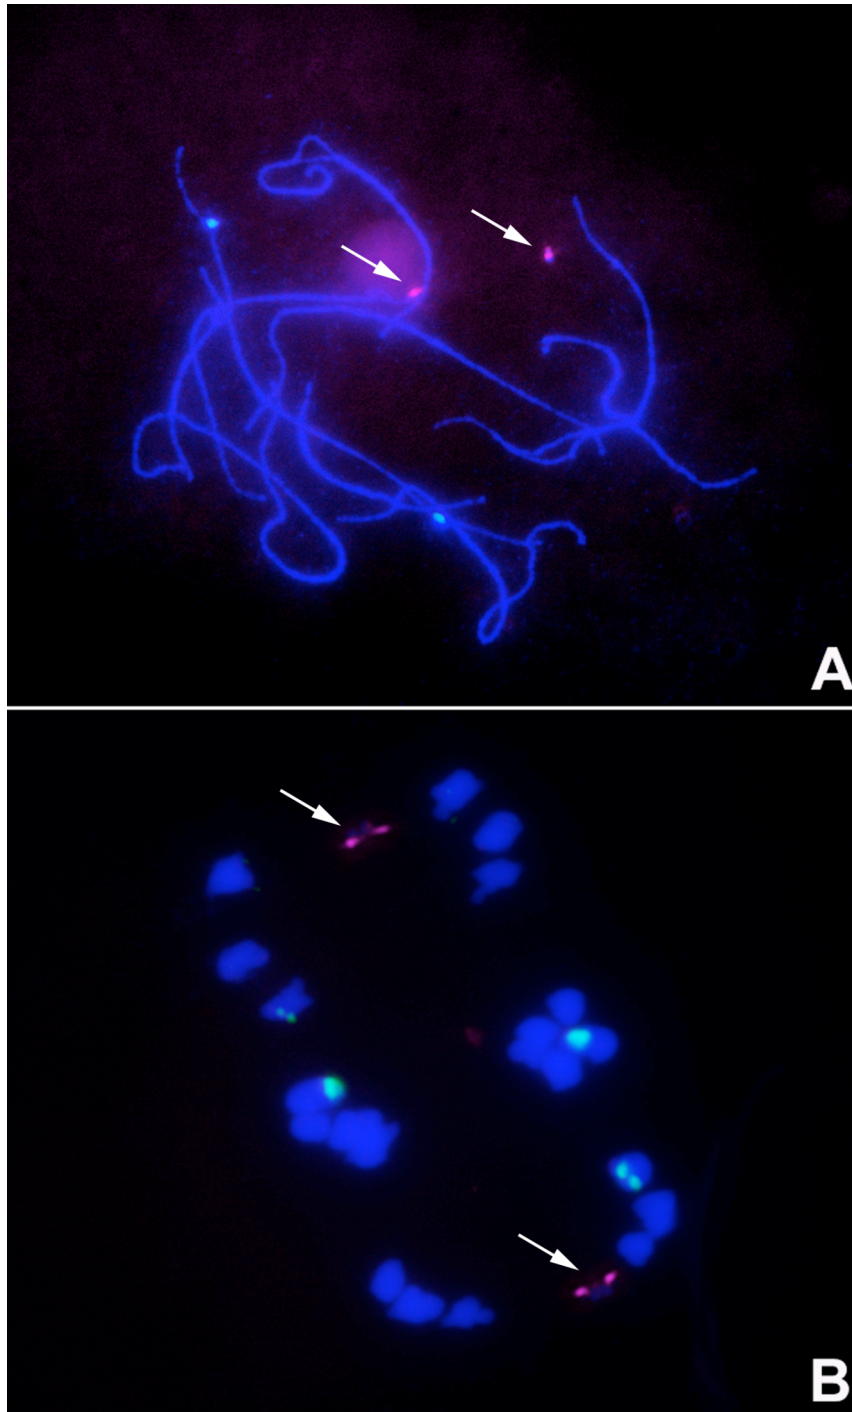

Supplemental Table 1. Characterization of minichromosomes as revealed by FISH using ZmBs, Knob, CRM and CentC sequences as probes.

| <b>No</b> | <b>Size</b> | <b>ZmBs</b> | <b>Knob</b> | <b>CentC</b> | <b>CRM</b> |
|-----------|-------------|-------------|-------------|--------------|------------|
| 1         | large       | +           | +           | +            | +          |
| 2         | small       | + +         | + +         | + +          | + +        |
| 3         | small       | + +         | + +         | + +          | + +        |
| 4         | small       | +           | +           | +            | +          |
| 5         | small       | + +         | + -         | + +          | + +        |
| 6         | large       | +           | +           | +            | +          |
| 7         | small       | +           | +           | +            | +          |
| 8         | small       | +           | +           | +            | +          |
| 9         | tiny        | +           | -           | +            | +          |
| 10        | small       | + +         | + +         | + +          | + +        |
| 11        | medium      | +           | +           | +            | +          |
| 12        | small       | + +         | - -         | + -          | + -        |
| 13        | small       | + +         | + +         | + +          | + +        |
| 14        | tiny        | +           | +           | +            | +          |
| 15        | medium      | +           | -           | +            | +          |
| 16        | large       | +           | +           | +            | +          |
| 17        | small       | + +         | + +         | + +          | + +        |
| 18        | small       | +           | +           | +            | +          |
| 19        | small       | +           | +           | +            | +          |
| 20        | small       | +           | +           | +            | +          |
| 21        | small       | +           | +           | +            | +          |
| 22        | small       | +           | +           | +            | +          |

"+ +" : indicates that the minichromosome has two centromere regions.

"+" : indicates that the minichromosome has one centromere region.

"-" : indicates these sequences are not present on the chromosome.

Supplemental Table 2. Meiotic analysis of plants containing one minichromosome.

|    | <b>Size</b> | <b>Pachytene pairing with chr. 9</b> | <b>Metaphase I</b> | <b>Anaphase I</b> | <b>Metaphase II</b> | <b>Anaphase II</b> | <b>B-repeat signals in cells of tetrad</b> |
|----|-------------|--------------------------------------|--------------------|-------------------|---------------------|--------------------|--------------------------------------------|
| 1  | large       | no                                   | univalent          | normal            | sisters associated  | normal             | 1 or 0                                     |
| 2  | small       | no                                   | univalent          | sisters split     | sister chromatid    | random             | 1 or 0                                     |
| 3  | small       | no                                   | univalent          | sisters split     | sister chromatid    | random             | 1 or 0                                     |
| 4  | small       | no                                   | univalent          | normal            | sisters associated  | normal             | 1 or 0                                     |
| 5  | small       | no                                   | univalent          | sisters split     | sister chromatid    | random             | 1 or 0                                     |
| 6  | large       | no                                   | univalent          | normal            | sisters associated  | normal             | 1 or 0                                     |
| 7  | small       | no                                   | univalent          | sisters split     | sister chromatid    | random             | 1 or 0                                     |
| 8  | small       | no                                   | univalent          | sisters split     | sister chromatid    | random             | 1 or 0                                     |
| 9  | tiny        | no                                   | univalent          | sisters split     | sister chromatid    | random             | 1 or 0                                     |
| 10 | small       | no                                   | univalent          | sisters split     | sister chromatid    | random             | 1 or 0                                     |
| 11 | medium      | no                                   | univalent          | normal            | sisters associated  | normal             | 1 or 0                                     |
| 12 | small       | no                                   | univalent          | sisters split     | sister chromatid    | random             | 1 or 0                                     |
| 13 | small       | no                                   | univalent          | sisters split     | sister chromatid    | random             | 1 or 0                                     |
| 14 | tiny        | no                                   | univalent          | sisters split     | sister chromatid    | random             | 1 or 0                                     |
| 15 | medium      | no                                   | univalent          | normal            | sisters associated  | normal             | 1 or 0                                     |
| 16 | large       | no                                   | univalent          | normal            | sisters associated  | normal             | 1 or 0                                     |
| 17 | small       | no                                   | univalent          | sisters split     | sister chromatid    | random             | 1 or 0                                     |
| 18 | small       | no                                   | univalent          | sisters split     | sister chromatid    | random             | 1 or 0                                     |
| 19 | small       | no                                   | univalent          | normal            | sisters associated  | normal             | 1 or 0                                     |
| 20 | small       | no                                   | univalent          | sisters split     | sister chromatid    | random             | 1 or 0                                     |
| 21 | small       | no                                   | univalent          | sisters split     | sister chromatid    | random             | 1 or 0                                     |
| 22 | small       | no                                   | univalent          | normal            | sisters associated  | normal             | 1 or 0                                     |

Supplemental Table 3. Meiotic analysis of plants containing two minichromosomes.

| No | Size   | Pachytene pairing (%) | n   | Diakinesis pairing (%) | n  | Metaphase I                | Anaphase I                   | Metaphase II                | Anaphase II | B-repeat in cells of tetrad |
|----|--------|-----------------------|-----|------------------------|----|----------------------------|------------------------------|-----------------------------|-------------|-----------------------------|
| 1  | large  | 100                   | 50  | 100                    | 34 | bivalent                   | normal                       | sisters associated          | normal      | 1                           |
| 2  | small  | 0                     | 63  | 0                      | 35 | two univalents             | sisters split                | sister chromatid            | random      | 1 or 2                      |
| 3  | small  | 0                     | 157 | 0                      | 81 | two univalents             | sisters split                | sister chromatid            | random      | 1 or 2                      |
| 4  | small  | 100                   | 142 | 79                     | 83 | bivalent or two univalents | normal                       | sisters associated          | normal      | 1                           |
| 5  | small  | 25                    | 78  | 0                      | 58 | two univalents             | sisters split                | sister chromatid            | random      | 1 or 2                      |
| 6  | large  | 100                   | 33  | 100                    | 52 | bivalent                   | normal                       | sisters associated          | normal      | 1                           |
| 7  | small  | 91                    | 43  | 60                     | 57 | two univalents             | segregation or sisters split | sisters associated or not   | random      | 1 or 2                      |
| 8  | small  | 0                     | 60  | 0                      | 40 | two univalents             | sisters split                | sister chromatid            | random      | 1 or 2                      |
| 9  | tiny   | 100                   | 70  | 100                    | 45 | bivalent                   | sisters split                | sister chromatid            | random      | 1 or 2                      |
| 10 | small  | 0                     | 61  | 0                      | 37 | two univalents             | sisters split                | sister chromatid            | random      | 1 or 2                      |
| 11 | medium | 100                   | 45  | 100                    | 30 | bivalent                   | normal                       | sisters associated          | normal      | 1                           |
| 12 | small  | 0                     | 42  | 0                      | 33 | two univalents             | sisters split                | sister chromatid            | random      | 1 or 2                      |
| 13 | small  | 65                    | 146 | 36                     | 90 | two univalents             | sisters split                | sister chromatid            | random      | 1 or 2                      |
| 14 | small  | 26                    | 82  | 0                      | 70 | two univalents             | sisters split                | sister chromatid            | random      | 1 or 2                      |
| 15 | medium | 100                   | 33  | 100                    | 30 | bivalent                   | normal                       | sisters associated          | normal      | 1                           |
| 16 | large  | 100                   | 75  | 100                    | 30 | bivalent                   | normal                       | sister chromatid associated | normal      | 1                           |
| 17 | small  | 0                     | 40  | 0                      | 40 | two univalents             | sisters split                | sister chromatid            | random      | 1 or 2                      |
| 18 | small  | 0                     | 55  | 0                      | 31 | two univalents             | sisters split                | sister chromatid            | random      | 1 or 2                      |
| 19 | small  | 100                   | 63  | 100                    | 51 | bivalent                   | normal                       | sisters associated          | normal      | 1                           |
| 20 | small  | 0                     | 72  | 0                      | 43 | two univalents             | sisters split                | sister chromatid            | random      | 1 or 2                      |
| 21 | small  | 100                   | 68  | 90                     | 60 | two univalents             | sistes split                 | sister chromatid            | random      | 1 or 2                      |
| 22 | small  | 100                   | 50  | 100                    | 33 | bivalent or two univalents | normal                       | sisters associated          | normal      | 1                           |

Supplemental Table 4. Minichromosome transmission rates revealed by pollen FISH and selfing.

| <b>No</b> | <b>size</b> | Transmission rate by pollen | Transmission by selfing |
|-----------|-------------|-----------------------------|-------------------------|
| 1         | large       | 20%                         | 37%                     |
| 2         | small       | 10%                         | 24%                     |
| 2         | small       | 10%                         | 40%                     |
| 4         | small       | 25%                         | 37%                     |
| 5         | small       | 15%                         | 33%                     |
| 6         | large       | 20%                         | 45%                     |
| 7         | small       | 15%                         | 50%                     |
| 8         | small       | 12%                         | 33%                     |
| 9         | tiny        | 10%                         | 30%                     |
| 10        | small       | 15%                         | 30%                     |
| 11        | medium      | 30%                         | 55%                     |
| 12        | small       | 8%                          | 20%                     |
| 13        | small       | 15%                         | 37%                     |
| 14        | tiny        | 22%                         | 42%                     |
| 15        | medium      | 15%                         | 40%                     |
| 16        | large       | 20%                         | 26%                     |
| 17        | small       | 10%                         | 20%                     |
| 18        | small       | 15%                         | 22%                     |
| 19        | small       | 10%                         | 28%                     |
| 20        | small       | 10%                         | 55%                     |
| 21        | small       | 15%                         | 57%                     |
| 22        | small       | 10%                         | 30%                     |

Transmission rate was detected by pollen FISH. Transmission by selfing was detected by FISH on root tip cells of the progeny.  
All the tested plants contained one minichromosome.
